# Supplementary material
Source: Royal Society of Chemistry journal article supplement (https://www.rsc.org/suppdata/dt/1999/931/809459d.doc)
Supplement: Supplementary file 1 [file 809459d.doc]

# Structural and photophysical behaviour of lanthanide complexes with a tetraazacyclododecane featuring carbamoyl pendant arms

**Gaël Zucchi, a**  **Rosario Scopelliti, a** **Pierre-André Pittet a Jean-Claude G. Bünzli,*, a and Robin D. Rogers b**

*a Institute of Inorganic and Analytical Chemistry, University of Lausanne, CH-1015 Lausanne, Switzerland*

*b Department of Chemistry, The University of Alabama, Tuscaloosa, Alabama, 35487-0336, USA*

**SUPPORTING INFORMATION**

**(11 PAGES)**

**Table S1.** Least-squares planes in the molecular structure of L1.

Nr 1 P Q R S Sigref 0.000 Sigpln 0.005 Chisq 0.0 Pl.Hyp.

----------------------------------------------------------------------------------------------

Ring 0.6898 -0.2368 0.6842 7.2705 #C(8) 0.002 #C(9) -0.004 #C(10) 0.001 #C(11) 0.004

A 6 8.9925 -3.8352 5.7853 7.2705 #C(12) -0.006 #C(13) 0.003 N(3) -0.775 C(7) 0.072

C(19)a -1.215 C(20)a -0.815

----------------------------------------------------------------------------------------------

Nr 2 P Q R S Sigref 0.000 Sigpln 0.006 Chisq 0.0 Pl.Hyp.

----------------------------------------------------------------------------------------------

Ring 0.4465 0.6546 -0.6100 4.3342 #C(17) -0.006 #C(18) 0.003 #C(19) 0.002 #C(20) -0.005

A 6 5.8204 10.6020 -6.4408 4.3342 #C(21) 0.002 #C(22) 0.004 O(2) -0.834 N(4) 0.802

C(11) 0.626 C(12) -0.106 C(13) 0.470 C(14) 1.401

C(15) 0.351 C(16) -0.091

----------------------------------------------------------------------------------------------

Nr 3 P Q R S Sigref 0.000 Sigpln 0.479 Chisq 0.0 Pl.Hyp.

----------------------------------------------------------------------------------------------

Ring 0.7101 0.5563 -0.4315 9.1339 #N(1) -0.411 #N(2) -0.629 #C(1) 0.626 #C(2) 0.023

A 12 9.2569 9.0108 -5.0324 9.1339 #C(3) 0.273 #C(4) 0.025 #N(1)a 0.411 #N(2)a 0.629

#C(1)a -0.626 #C(2)a -0.023 #C(3)a -0.273 #C(4)a -0.025

O(1) 0.692 N(3) -0.329 C(5) -1.051 C(6) -0.139

C(7) 0.379 C(8) -0.211 C(9) 0.601 C(10) 0.059

C(11) -1.301 O(1)a -0.692 N(3)a 0.329 C(5)a 1.051

C(6)a 0.139 C(7)a -0.379 C(8)a 0.211 C(9)a -0.601

C(10)a -0.059 C(11)a 1.301

----------------------------------------------------------------------------------------------

Nr 4 P Q R S Sigref 0.000 Sigpln 1.493 Chisq 0.0 Pl.Hyp.

----------------------------------------------------------------------------------------------

Resd 0.1382 0.0368 0.9897 1.1984 #O(1) -1.161 #O(2) 3.510 #N(1) -0.282 #N(2) 1.981

A 56 1.8011 0.5956 9.4076 1.1984 #N(3) 0.987 #N(4) 1.365 #C(1) 0.351 #C(2) 1.825

#C(3) 2.165 #C(4) -1.738 #C(5) 0.160 #C(6) -0.065

#C(7) 0.876 #C(8) 0.286 #C(9) -0.610 #C(10) -1.097

#C(11) -0.707 #C(12) 0.173 #C(13) 0.678 #C(14) 3.051

#C(15) 2.664 #C(16) 0.832 #C(17) 0.057 #C(18) -1.131

#C(19) -1.832 #C(20) -1.373 #C(21) -0.204 #C(22) 0.505

#O(1)a 1.161 #O(2)a -3.510 #N(1)a 0.282 #N(2)a -1.981

#N(3)a -0.987 #N(4)a -1.365 #C(1)a -0.351 #C(2)a -1.825

#C(3)a -2.165 #C(4)a 1.738 #C(5)a -0.160 #C(6)a 0.065

#C(7)a -0.876 #C(8)a -0.286 #C(9)a 0.610 #C(10)a 1.097

#C(11)a 0.707 #C(12)a -0.173 #C(13)a -0.678 #C(14)a -3.051

#C(15)a -2.664 #C(16)a -0.832 #C(17)a -0.057 #C(18)a 1.131

#C(19)a 1.832 #C(20)a 1.373 #C(21)a 0.204 #C(22)a -0.505

----------------------------------------------------------------------------------------------

Nr 5 P Q R S Sigref 0.000 Sigpln 0.026 Chisq 0.0 Pl.Hyp.

----------------------------------------------------------------------------------------------Plan 0.4249 0.8848 0.1914 7.5521 #O(1) 0.009 #N(3) 0.016 #C(6) -0.017 #C(7) -0.007

A 4 5.5387 14.3305 1.3379 7.5521 O(2) 0.263 N(1) 0.790 N(4) 0.129 C(4) 0.448

C(5) -0.128 C(8) -1.379 C(15) 0.788 C(16) -1.303

C(21) -1.254 C(22) -0.906 C(3)a 0.596

----------------------------------------------------------------------------------------------

Nr 6 P Q R S Sigref 0.000 Sigpln 0.014 Chisq 0.0 Pl.Hyp.

----------------------------------------------------------------------------------------------Plan 0.7591 -0.6406 0.1159 0.4336 #O(2) 0.004 #N(2) 0.011 #N(4) -0.009 #C(14) -0.016

A 6 9.8952 -10.3756 0.2043 0.4336 #C(15) 0.009 #C(16) 0.001 N(1) 1.374 C(1) 1.475

C(2) 1.383 C(3) -0.764 C(4) 0.925 C(17) -1.328

C(18) -1.400 O(2)a -1.351 N(2)a -1.358 N(4)a -1.338

C(3)a -0.583 C(14)a -1.332 C(15)a -1.357 C(16)a -1.348

C(17)a -0.019 C(18)a 0.052 C(19)a 1.252 C(22)a 1.159

----------------------------------------------------------------------------------------------Nr 7 P Q R S Sigref 0.000 Sigpln 0.010 Chisq 0.0 Pl.Hyp.

----------------------------------------------------------------------------------------------

Plan 0.3646 0.9083 0.2052 7.0631 #O(1) -0.003 #N(3) -0.003 #C(5) -0.002 #C(6) 0.008

A 4 4.7530 14.7109 1.5443 7.0631 O(2) 0.650 N(1) 0.965 N(4) 0.463 C(4) 0.625

C(7) -0.121 C(15) 1.139 C(16) -0.948 C(17) -1.152

C(21) -0.668 C(22) -0.394 C(3)a 0.863

----------------------------------------------------------------------------------------------

Nr 8 P Q R S Sigref 0.000 Sigpln 0.023 Chisq 0.0 Pl.Hyp.

----------------------------------------------------------------------------------------------Plan 0.6897 -0.2498 0.6796 7.2727 #C(7) 0.028 #C(8) -0.021 #C(9) -0.019 #C(10) 0.006

A 7 8.9910 -4.0460 5.7416 7.2727 #C(11) 0.018 #C(12) -0.001 #C(13) -0.012 N(3) -0.828

C(19)a -1.371 C(20)a -0.956

----------------------------------------------------------------------------------------------Nr 9 P Q R S Sigref 0.000 Sigpln 0.028 Chisq 0.0 Pl.Hyp.

----------------------------------------------------------------------------------------------Plan 0.4618 0.6502 -0.6033 4.3327 #C(16) -0.035 #C(17) 0.024 #C(18) 0.021 #C(19) -0.004

A 7 6.0194 10.5313 -6.3941 4.3327 #C(20) -0.023 #C(21) -0.005 #C(22) 0.021 O(2) -0.758

N(4) 0.869 C(11) 0.796 C(12) 0.056 C(13) 0.630

C(14) 1.488 C(15) 0.428

______________________________________________________________________________________________

Table S2. Longitudinal (*T*1) and transverse (*T*2) relaxation times of the protons closest to EuIII  in [Eu(L1)]3+ 10-2 M in CD3OD (400.03 MHz, 295 K)

| Protonsa |  (ppm) | *T*1 (ms) | *T*2 (ms) |
| --- | --- | --- | --- |
| b | 26.71 | 35.1 | 1.5 |
| d | -2.38 | 52.9 | 6.3 |
| a | -6.02 | 39.4 | 3.0 |
| c | -7.71 | 49.4 | 5.5 |
| e or f | -12.68 | 38.9 | 2.5 |
| e or f | -13.48 | 55.6 | 5.5 |

a see Scheme for numbering
